# Supplementary material for: Process-based modelling of NH 3 exchange with grazed grasslands
Source: Copernicus journal article supplement (doi:10.5194/bg-14-4161-2017), 2017-09-21
Supplement: Supplementary file 1 [file bg-14-4161-2017-supplement.zip]

Archive with 3 entries (3 files):
- InputData.xlsx
- Supplementary_material.pdf
- bg-14-4161-2017-supplement-title-page.pdf
