# Supplementary material for: Process-based modelling of NH 3 exchange with grazed grasslands
Source: Copernicus journal article supplement (doi:10.5194/bg-14-4161-2017), 2017-09-21
Supplement: Supplementary file 1 [file bg-14-4161-2017-supplement.zip › bg-14-4161-2017-supplement-title-page.pdf]

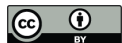

## *Supplement of*

# **Process-based modelling of $\text{NH}_3$ exchange with grazed grasslands**

**Andrea Móring et al.**

*Correspondence to:* Mark A. Sutton ([ms@ceh.ac.uk](mailto:ms@ceh.ac.uk))

- [bg-14-4161-2017-supplement-title-page.pdf](#)
- [InputData.xlsx](#)
- [Supplementary\\_material.pdf](#)

The copyright of individual parts of the supplement might differ from the CC BY 3.0 License.
