# Supplementary material for: Process-based modelling of NH 3 exchange with grazed grasslands
Source: Copernicus journal article supplement (doi:10.5194/bg-14-4161-2017), 2017-09-21
Supplement: Supplementary file 1 [file bg-14-4161-2017-supplement.zip › InputData.xlsx]

## Sheet: Headers
Header	Meaning	Symbol in the manuscript	Unit	Notes
Date	Date.	-	-	-
Hour	Hour of the day.	-	-	-
Julian_date	Number of the day in the year. (1st Jan = 1)	-	-	-
Xair	Air concentration of NH3 at 1 m height.	χa	µg N m-3	-
windspeed	Windspeed.	u	m s-1	-
T_soil	Soil temperature.	Tsoil	°C	-
Pressure	Surface atmospheric pressure.	p	kPa	-
H	Sensible heat flux.	H	W m-2	Converted to MJ m-2 hr-1 in the model.
Rain	Hourly precipitation amount.	P	mm	-
T_air2m	Air temperature at 2 m.	Tair	°C	-
Glob_rad	Global radiation.	Rglob	W m-2	Converted to MJ m-2 hr-1 in the model.
RH	Relative humidity.	RH	%	-
Cow	Number of cattle on the field.	-	-	-
Flux	NH3 exchange flux derived based on measurements with AMANDA.	Fχ	µg N m-2 s-1	Converted to ng NH3 m-2 s-1
winddir	Angle of the wind direction.	udir	°	-

## Sheet: P2002
Date	Hour	Julian_date	Xair	windspeed	T_soil	Pressure	H	Rain	T_air2m	Glob_rad	RH	Cow	Flux	winddir
2002-08-26	0	238	4.26108	0.183341	14.4825	100.782	-1.34113	0	11.9239	0.02	73.45	40	-7.958084303	263.949
2002-08-26	1	238	3.81801	0.402704	14.4175	100.776	-1.86741	0	12.0262	0.02	77.75	40	-19.38752435	290.792
2002-08-26	2	238	4.10006	0.267032	14.38	100.757	-1.90849	0	12.0075	0.02	78.35	40	-3.758810771	295.564
2002-08-26	3	238	4.93254	0.30176	14.34	100.728	0.689249	0	11.8096	0.02	79.25	40	-22.27181478	171.927
2002-08-26	4	238	4.70396	0.142616	14.305	100.698	-1.8049	0	11.2813	0.02	79.3	40	-6.205586918	320.889
2002-08-26	5	238	3.64817	0.387478	14.2475	100.677	-3.63896	0	10.7753	3.18925	79.65	40	0.338639764	263.16
2002-08-26	6	238	6.59911	0.557636	14.1675	100.661	-1.13736	0	11.4724	41.125	80.15	40	NA	208.758
2002-08-26	7	238	4.63919	0.63952	14.1225	100.658	8.09833	0	12.9523	107.6	79.8	40	-62.81671131	234.266
2002-08-26	8	238	1.85715	0.31519	14.155	100.663	14.5019	0	13.8671	170.5	82.3	40	-8.34544486	199.095
2002-08-26	9	238	2.143	0.713399	14.2525	100.66	24.5846	0	14.6656	224.95	80.4	40	-20.14909126	88.7005
2002-08-26	10	238	1.7664	0.549259	14.3975	100.639	60.4827	0	15.3887	324.3	77.85	40	-21.88264178	42.3082
2002-08-26	11	238	1.77395	0.453396	14.4325	100.606	107.543	0	16.7103	581.1	76.75	40	-30.2920737	135.138
2002-08-26	12	238	1.9259	0.220582	14.6075	100.571	93.209	0	17.8779	609	74.1	40	-22.73713059	84.2669
2002-08-26	13	238	2.19095	0.198571	14.78	100.536	139.186	0	18.9358	665.825	71.85	40	-3.271198751	138.626
2002-08-26	14	238	2.35205	0.517771	14.915	100.506	135.896	0	19.5301	600.375	68.45	40	-30.20168906	54.4607
2002-08-26	15	238	2.67338	0.28277	15.0525	100.455	100.745	0	20.1001	498.65	64.9	40	-43.15720327	35.8035
2002-08-26	16	238	2.83694	0.445229	15.1775	100.417	65.1763	0	20.1591	377.65	62.15	40	-34.93666285	73.0212
2002-08-26	17	238	2.53263	0.495572	15.27	100.366	34.9676	0	20.1025	241.175	60.95	40	-30.44036107	57.3837
2002-08-26	18	238	3.22157	0.475275	15.335	100.329	1.17729	0	18.4757	92.68	60.8	40	-19.29742426	199.472
2002-08-26	19	238	2.51319	0.533052	15.32	100.311	-13.6435	0	13.189	11.207	74.6	40	-15.66005165	257.154
2002-08-26	20	238	3.06926	1.48599	15.15	100.296	-31.6971	0	13.7133	0.02	71.95	40	NA	255.945
2002-08-26	21	238	2.73978	0.480683	14.98	100.291	-19.3811	0	13.6776	0.02	76.35	40	-0.660567942	231.756
2002-08-26	22	238	1.52301	1.04099	14.86	100.275	-14.7831	0	13.1766	0.02	80.4	40	NA	194.763
2002-08-26	23	238	0.918151	0.805348	14.7475	100.248	-13.7786	0	11.7132	0.02	83.05	40	NA	158.769
2002-08-27	0	239	0.943074	1.51915	14.58	100.203	-21.1959	0	12.2469	0.02	80.9	40	0.39725167	193.392
2002-08-27	1	239	0.671177	1.2729	14.5325	100.162	-34.245	0	10.5846	0.02	86.75	40	0.393544741	190.935
2002-08-27	2	239	0.5312	0.906041	14.4475	100.137	-26.6488	0	10.2601	0.02	84	40	-0.370050225	182.971
2002-08-27	3	239	0.682468	1.95276	14.3475	100.105	-34.1116	0	10.3144	0.02	84.5	40	0.666486432	196.122
2002-08-27	4	239	0.618497	2.51708	14.28	100.065	-28.1698	0	10.1908	0.02	86.15	40	0.27235147	193.957
2002-08-27	5	239	0.584567	2.10231	14.2325	100.044	-30.463	0	9.59652	4.55725	87.4	40	-2.991768028	197.244
2002-08-27	6	239	0.894299	2.44461	14.155	100.043	-18.3008	0	10.3738	53.7775	86.25	40	-0.0639404	187.186
2002-08-27	7	239	1.40388	2.87849	14.0325	100.051	9.47699	0	12.0245	188.85	87.35	40	-12.08867127	196.75
2002-08-27	8	239	2.5406	2.47329	13.9325	100.064	52.0294	0	15.514	341.1	82.65	40	-57.33466392	228.416
2002-08-27	9	239	2.32609	2.19121	14.005	100.08	73.0057	0	17.3377	486.875	82.75	40	-68.24036148	260.26
2002-08-27	10	239	3.67358	2.56695	14.2175	100.067	104.365	0	18.8779	578.05	78.75	40	NA	263.605
2002-08-27	11	239	4.30408	2.73997	14.445	100.048	108.775	0	19.8594	565.45	75.55	40	-121.2772521	269.864
2002-08-27	12	239	4.86448	2.90858	14.665	100.034	159.315	0	20.661	715.15	75.05	40	-196.3823533	269.496
2002-08-27	13	239	1.71	2.99732	14.9525	100.047	87.5979	0	19.7022	584.8	76.35	40	NA	256.951
2002-08-27	14	239	1.71	2.43451	15.1075	100.028	70.8068	0	19.671	436.025	77.15	40	NA	228.391
2002-08-27	15	239	1.71	2.74175	15.235	99.9927	21.2381	0	18.8431	246.525	77.75	40	NA	227.988
2002-08-27	16	239	1.71	2.70395	15.2975	99.9999	15.824	0	18.4516	189.775	78.95	40	NA	230.386
2002-08-27	17	239	1.71	2.64014	15.3325	99.9928	-10.502	0	17.7205	131.1	79.9	40	NA	232.005
2002-08-27	18	239	1.71	2.76267	15.34	99.9756	-18.713	0	16.886	69.7975	81.85	40	NA	213.691
2002-08-27	19	239	1.71	2.24148	15.3075	99.9696	-31.9321	0	16.0642	11.772	84.65	40	NA	218.935
2002-08-27	20	239	1.71	1.10313	15.25	99.9829	-21.258	0	15.2948	0.02	84.45	40	NA	239.547
2002-08-27	21	239	1.71	1.07777	15.18	100.004	-14.3485	0	15.0666	0.02	83	40	NA	221.051
2002-08-27	22	239	1.71	1.16975	15.1125	99.9972	-12.247	0	13.6979	0.02	84.4	40	NA	204.173
2002-08-27	23	239	1.71	1.00539	15.02	99.9775	-5.44643	0	13.3896	0.02	86.2	40	NA	209.813
2002-08-28	0	240	1.71	2.29738	14.925	99.9493	-0.0462513	0	14.1044	0.02	87.9	17	NA	204.75
2002-08-28	1	240	1.71	2.41838	14.8825	99.9126	-2.75721	0	14.1423	0.02	90.15	17	NA	195.626
2002-08-28	2	240	1.71	1.55533	14.845	99.8827	-1.30915	0	14.405	0.02	89.75	17	NA	223.832
2002-08-28	3	240	1.71	1.84561	14.8225	99.8463	-4.9069	0	14.1881	0.02	90.15	17	NA	223.526
2002-08-28	4	240	1.71	2.15535	14.78	99.8132	-1.45809	0	14.3531	0.02	88.2	17	NA	214.417
2002-08-28	5	240	1.71	1.72817	14.7575	99.7857	2.15291	0	13.9903	1.257	88.8	17	NA	212.958
2002-08-28	6	240	1.71	2.28926	14.7325	99.7743	1.98712	0	13.8409	18.75	87.9	17	NA	193.992
2002-08-28	7	240	1.71	2.47867	14.7075	99.7618	12.4848	0	14.3844	81.63	85.9	17	NA	201.462
2002-08-28	8	240	1.71	3.06165	14.6975	99.7452	27.8595	0	15.4122	167.075	85.6	17	NA	203.592
2002-08-28	9	240	1.71	3.2494	14.705	99.7514	31.0905	0	16.931	287.95	81.6	17	NA	210.224
2002-08-28	10	240	1.71	3.03701	14.74	99.7421	72.8454	0	18.9358	465.575	74.25	17	NA	210.842
2002-08-28	11	240	1.71	3.61678	14.9025	99.7125	62.9836	0	19.5839	457.225	72.75	17	NA	212.044
2002-08-28	12	240	1.71	4.00745	15.075	99.6704	92.0426	0	19.6534	494.125	76.1	17	NA	219.493
2002-08-28	13	240	1.71	4.02129	15.2425	99.6344	31.8783	0	19.1234	289.025	77.75	17	NA	214.394
2002-08-28	14	240	1.70425	4.40268	15.3225	99.5861	41.9503	0	19.113	294.25	78.75	17	NA	208.457
2002-08-28	15	240	2.21184	3.28204	15.39	99.4973	17.6163	0	19.4394	226.5	77.2	17	-31.26543871	215.941
2002-08-28	16	240	2.29093	4.43912	15.45	99.4741	37.7946	0	19.6447	386.125	74.95	17	-85.31250469	213.992
2002-08-28	17	240	2.18053	3.84182	15.52	99.4425	13.1887	0	19.2755	231.55	75.75	17	1.56553275	212.556
2002-08-28	18	240	2.1018	3.69083	15.575	99.4132	-28.54	0	17.9247	41.7625	77.7	17	-14.71597999	216.315
2002-08-28	19	240	2.1515	2.97482	15.5275	99.3869	-33.1059	0	17.2155	12.5678	80	17	-20.97031994	225.364
2002-08-28	20	240	2.11242	2.86148	15.4625	99.3768	-22.8818	0	16.9228	0.02	82.1	17	-7.918267283	225.088
2002-08-28	21	240	1.95883	2.93411	15.405	99.3514	-18.8154	0	16.9754	0.02	83.3	17	-14.12886518	214.45
2002-08-28	22	240	1.83671	3.08545	15.365	99.3027	-13.1761	0	16.8374	0.02	85.45	17	-14.28955162	212.743
2002-08-28	23	240	1.2989	3.26388	15.34	99.2462	-9.99904	0	16.5529	0.02	87.7	17	-3.418657003	197.697
2002-08-29	0	241	1.46812	3.08537	15.31	99.2084	-13.1047	0	16.8139	0.02	88.7	17	-9.928874446	210.396
2002-08-29	1	241	1.50315	3.5855	15.29	99.1648	-7.16609	0	16.8354	0.02	89.75	17	-31.84078405	214.905
2002-08-29	2	241	1.74413	3.06489	15.265	99.121	-23.0991	0	17.0307	0.02	90.2	17	-13.0962917	211.388
2002-08-29	3	241	1.72385	2.8871	15.25	99.0866	-23.5296	0	17.1559	0.02	89.45	17	-13.83732002	206.378
2002-08-29	4	241	1.51424	2.46235	15.25	99.0653	-32.6355	0	16.5215	0.02	91.4	17	-11.36664078	230.691
2002-08-29	5	241	2.14249	2.86301	15.245	99.0293	-36.8212	0.308	16.5341	0.35075	90.1	17	-28.71013695	249.712
2002-08-29	6	241	2.08786	2.99037	15.235	99.0445	-22.8729	0.616	16.1505	40.2825	92.2	17	-106.2568405	254.508
2002-08-29	7	241	2.24886	3.43885	15.2475	99.1027	4.34012	0	15.2861	118.875	90.85	17	-29.73908492	254.919
2002-08-29	8	241	1.95118	3.45338	15.24	99.156	0.997713	0	15.1929	164.35	84.95	17	-32.56186223	238.803
2002-08-29	9	241	1.63821	4.39719	15.2375	99.1876	-0.52821	0	15.3887	218.125	78.25	17	-38.78589744	228.311
2002-08-29	10	241	1.71491	4.94036	15.2275	99.2132	42.066	0	16.3887	333.725	74.55	17	-38.12492185	230.672
2002-08-29	11	241	1.06144	4.96708	15.2575	99.2149	18.7139	0	16.2575	218.85	73.7	17	-14.21167709	232.379
2002-08-29	12	241	1.75159	4.88833	15.25	99.2183	68.9349	0	16.9967	393.1	71.45	17	-51.71053584	234.031
2002-08-29	13	241	1.92907	5.07945	15.2875	99.2533	64.6656	0	16.7086	345.75	69.25	17	-73.60733851	237.193
2002-08-29	14	241	1.67585	5.46466	15.3175	99.2819	95.8721	0	17.057	440.075	70.4	17	-61.05000525	232.161
2002-08-29	15	241	1.96919	5.3349	15.3675	99.2795	103.613	0	17.4874	486.075	68.05	17	-66.63318311	235.374
2002-08-29	16	241	2.00751	4.73329	15.42	99.2757	30.1551	0	16.4188	284.125	68.05	17	-99.72358713	238.413
2002-08-29	17	241	1.8965	4.21622	15.4275	99.2694	-18.1669	0	15.3751	118.375	71.95	17	-60.91342167	239.178
2002-08-29	18	241	1.67042	2.89541	15.395	99.2802	-9.39102	0	14.4616	45.4975	76.25	17	-40.26423693	241.506
2002-08-29	19	241	1.33164	3.63615	15.3525	99.3228	-42.3509	0	13.367	7.42875	77.65	17	-26.16852957	237.311
2002-08-29	20	241	1.30786	2.80132	15.2725	99.348	-34.3842	0	12.6861	0.02	78.25	17	-20.83986159	233.285
2002-08-29	21	241	1.17523	3.07423	15.1775	99.365	-38.579	0	12.5633	0.02	75.9	17	-18.19315063	214.393
2002-08-29	22	241	0.783364	2.54234	15.0925	99.3663	-16.8382	0	11.832	0.02	81.35	17	-8.49667219	195.833
2002-08-29	23	241	1.33192	2.90351	14.995	99.3621	-23.5666	0	12.581	0.02	81.25	17	-10.66266584	228.461
2002-08-30	0	242	1.43352	3.18502	14.925	99.3519	-24.6163	0	12.9802	0.02	78.45	17	-18.01792689	231.293
2002-08-30	1	242	1.06605	2.18843	14.8675	99.2957	-9.14177	0	12.338	0.02	80.85	17	-11.89440357	216.699
2002-08-30	2	242	1.08394	1.47983	14.8175	99.2554	-6.53827	0	12.159	0.02	83.6	17	-7.37782809	219.352
2002-08-30	3	242	1.27723	1.86383	14.7675	99.2077	-4.61741	0	12.3109	0.02	83.85	17	-16.64995754	211.717
2002-08-30	4	242	1.1188	0.774687	14.73	99.1901	-12.6976	0	11.9437	0.02	85.75	17	-4.285258293	168.478
2002-08-30	5	242	0.687623	0.320641	14.6725	99.1246	-2.37186	0.924	11.6285	0.02	87.55	17	NA	208.435
2002-08-30	6	242	0.706763	0.186513	14.5675	99.0447	-0.668901	0.924	11.6317	7.60625	87.9	17	NA	199.875
2002-08-30	7	242	1.25735	0.704024	14.475	98.9735	1.14443	1.232	11.9724	19.7725	88.35	17	-12.73251567	174.426
2002-08-30	8	242	0.725238	1.22975	14.17	98.8737	3.79727	2.158	12.2743	34.4225	89.3	17	-0.880898197	32.1507
2002-08-30	9	242	0.569953	0.38589	14.095	98.7451	0.798774	4.318	12.8921	38.38	90.05	17	-1.07625731	84.5998
2002-08-30	10	242	0.597946	0.323843	14.105	98.6039	3.74496	5.243	13.4609	54.3975	91.65	17	12.86823661	111.029
2002-08-30	11	242	0.632746	1.62756	14.1775	98.4482	6.23466	3.701	14.3937	55.5875	91.95	17	23.48894079	212.156
2002-08-30	12	242	0.385163	2.37473	14.2425	98.3685	9.27961	4.318	15.337	133.825	92.2	17	9.018537672	200.111
2002-08-30	13	242	0.471228	3.57322	14.3125	98.2995	12.6729	1.85	17.0619	148.6	93	17	6.448866395	210.846
2002-08-30	14	242	0.742035	3.62889	14.39	98.2568	-2.0646	0	17.8166	120.625	92.3	17	-6.397194692	216.87
2002-08-30	15	242	0.609723	3.98989	14.485	98.2387	1.27792	0	17.4159	84.09	91.7	17	-12.12638731	214.885
2002-08-30	16	242	0.859491	4.47638	14.545	98.2008	-13.4288	0	17.5566	146.475	89.35	17	-12.61943769	220.295
2002-08-30	17	242	1.03525	3.96036	14.5775	98.1873	-13.9707	0	17.6538	133.15	80.5	17	-6.510388258	213.939
2002-08-30	18	242	0.946669	3.62648	14.615	98.1969	-28.1591	0	16.8817	49.53	82.45	17	-19.3550296	214.041
2002-08-30	19	242	0.670971	3.409	14.6125	98.2053	-13.729	0.308	16.0381	1.78275	86.9	17	-20.00560481	213.796
2002-08-30	20	242	0.576381	3.92794	14.615	98.269	-11.026	0	15.0013	0.02	90.35	17	-16.32043608	243.061
2002-08-30	21	242	0.487615	3.68339	14.56	98.4672	-14.8949	0.616	13.4227	0.02	90	17	-14.23382722	295.789
2002-08-30	22	242	0.487017	3.54334	14.455	98.6967	-13.0232	0	12.9477	0.02	85.25	17	-25.76232126	286.548
2002-08-30	23	242	0.380091	3.02822	14.3425	98.8891	-25.4464	0.308	12.4686	0.02	82.9	17	-25.04612454	284.247
2002-08-31	0	243	0.455089	2.97348	14.245	99.0386	-36.2469	0	11.5496	0.02	82.25	17	-26.91963283	263.504
2002-08-31	1	243	0.456341	3.39357	14.17	99.1495	-32.828	0	11.031	0.02	79.9	17	-18.90312051	258.278
2002-08-31	2	243	0.425616	3.55841	14.0975	99.2578	-60.4509	0	10.0905	0.02	78.25	17	-20.55556959	258.563
2002-08-31	3	243	0.486257	3.61139	13.9925	99.3327	-64.765	0	9.89354	0.02	76.95	17	-23.91911324	255.579
2002-08-31	4	243	0.638013	2.67975	13.8975	99.4281	-61.8716	0	9.67568	0.02	77.8	17	-22.96116165	250.557
2002-08-31	5	243	0.624256	2.86515	13.815	99.5247	-64.1348	0	9.4792	1.296	78.65	17	-19.85222416	251.758
2002-08-31	6	243	0.837709	2.4343	13.7275	99.6259	-48.8615	0	9.70129	49.66	79.3	17	-21.91171081	244.45
2002-08-31	7	243	1.00315	2.63859	13.645	99.715	-13.6838	0	10.9187	171.6	79.45	17	-13.38065996	250.466
2002-08-31	8	243	1.00161	2.71244	13.58	99.8242	39.5006	0	12.0959	353.25	74.9	17	-8.77414166	258.412
2002-08-31	9	243	1.03516	3.13011	13.6475	99.8992	49.9702	0	13.0006	404.8	66.85	17	-15.6681512	251.195
2002-08-31	10	243	0.770459	3.52811	13.72	99.9764	55.7767	0	13.4361	298.65	61.4	17	-10.40847192	272.203
2002-08-31	11	243	0.7689	3.8089	13.6925	100.033	95.4232	0	14.5463	490.625	59.1	17	-32.54995645	274.057
2002-08-31	12	243	0.795954	4.12976	13.7725	100.093	130.783	0	14.8634	571.35	60.45	17	-51.13017063	271.391
2002-08-31	13	243	0.768375	4.47195	13.8475	100.139	123.835	0	15.0399	538.425	58.65	17	-49.26499181	267.086
2002-08-31	14	243	0.710617	4.01584	13.88	100.205	125.365	0	15.2441	598.1	58.05	17	-48.24943126	274.916
2002-08-31	15	243	0.642428	4.18607	13.92	100.27	83.3731	0	15.041	481.1	56.6	17	-42.30799459	274.403
2002-08-31	16	243	0.613171	3.54801	13.9375	100.323	33.0227	0	14.5841	310.9	57.3	17	-31.06599247	284.277
2002-08-31	17	243	0.552516	3.12157	13.9075	100.372	-4.44023	0	13.9652	195.875	57.6	17	-30.25208272	285.776
2002-08-31	18	243	0.539159	2.38528	13.86	100.453	-26.5402	0	13.1665	87.3225	57.7	17	-26.13503604	267.502
2002-08-31	19	243	0.702199	2.42242	13.815	100.552	-46.4482	0	11.7749	8.3145	61.55	17	-20.74908891	257.569
2002-08-31	20	243	0.921047	2.22793	13.7475	100.656	-45.9968	0	11.1599	0.02	63.8	17	-13.06273581	260.566
2002-08-31	21	243	1.1313	2.35659	13.68	100.698	-56.0877	0	10.3108	0.02	66	17	-13.33871141	255.223
2002-08-31	22	243	0.772105	2.7559	13.59	100.725	-73.4201	0	10.1749	0.02	68.3	17	-15.15533189	265.395
2002-08-31	23	243	0.550639	1.72864	13.4825	100.759	-59.4198	0	9.80949	0.02	70.55	17	-16.86544238	271.039
2002-09-01	0	244	0.449305	1.42894	13.3775	100.795	-47.6271	0	9.1842	0.02	71.45	17	-14.89153362	276.536
2002-09-01	1	244	0.431205	0.872703	13.2825	100.812	-27.4066	0	8.38727	0.02	72.45	17	-6.862414746	228.748
2002-09-01	2	244	0.335128	1.56517	13.1725	100.821	-34.1493	0	7.68961	0.02	73.45	17	-11.16373349	195.831
2002-09-01	3	244	0.229422	0.932648	13.075	100.84	-14.6786	0	6.15505	0.02	77.65	17	-1.624277126	196.811
2002-09-01	4	244	0.160323	1.57862	12.92	100.86	-20.8674	0	5.94078	0.02	76.95	17	-2.007437676	194.939
2002-09-01	5	244	0.120554	2.38175	12.81	100.88	-15.7132	0	6.1384	0.98175	77.9	17	-2.285398098	191.584
2002-09-01	6	244	0.210198	2.4958	12.7475	100.92	-7.45145	0	6.7927	49.2725	79.85	17	-4.325037648	196.831
2002-09-01	7	244	0.345889	2.43209	12.685	100.954	7.05573	0	8.47651	180.9	84.2	17	-7.876880681	192.673
2002-09-01	8	244	0.519977	2.54192	12.6575	100.94	28.9476	0	11.0077	327.95	80.45	17	-7.389767807	201.392
2002-09-01	9	244	0.546446	2.84553	12.7425	100.938	77.2421	0	12.935	465.4	76.95	17	-3.522023676	200.18
2002-09-01	10	244	0.619822	3.23787	12.885	100.924	106.646	0	14.4832	564.025	69.6	17	-21.38798822	212.313
2002-09-01	11	244	0.715984	3.25754	13.0525	100.895	121.648	0	15.4031	620.175	62.35	17	-38.23192297	208.236
2002-09-01	12	244	0.794288	3.62298	13.2375	100.875	91.8093	0	15.8471	500.375	61.55	17	-45.52894484	211.51
2002-09-01	13	244	0.863169	3.70536	13.38	100.85	56.0379	0	15.7516	371.75	61.75	17	-44.68991045	216.05
2002-09-01	14	244	0.84901	3.80428	13.485	100.804	47.1553	0	15.8172	357.575	63.6	17	-35.13467206	209.471
2002-09-01	15	244	0.830442	3.72654	13.5625	100.762	19.1902	0	15.5366	273.55	64.05	17	-47.35898832	211.291
2002-09-01	16	244	1.02423	3.16843	13.62	100.723	-2.10948	0	15.1743	176.6	65.05	17	-41.09687133	210.986
2002-09-01	17	244	1.19577	3.58896	13.65	100.69	-30.4359	0	14.5519	91.825	66.8	17	-60.32200721	214.376
2002-09-01	18	244	1.03486	3.40488	13.65	100.657	-24.2507	0.308	13.9045	50.065	67.4	17	-27.04288837	212.569
2002-09-01	19	244	1.02332	3.30824	13.6175	100.644	-29.3504	0	13.1758	6.21825	70.4	17	-28.29145052	208.968
2002-09-01	20	244	1.22663	2.14208	13.5675	100.621	-10.3199	0	12.7205	0.02	72.7	17	-13.38416079	217.591
2002-09-01	21	244	1.38687	2.82718	13.53	100.616	-14.5965	0	12.5034	0.02	74.85	17	-27.11087757	217.998
2002-09-01	22	244	1.10363	2.84928	13.4875	100.612	-16.6228	0	12.4114	0.02	77	17	-8.885225088	198.252
2002-09-01	23	244	1.02727	3.22931	13.4375	100.608	-19.8694	0	12.4251	0.02	78.1	17	-8.095839914	196.758
2002-09-02	0	245	1.03281	2.65745	13.405	100.604	-29.0746	0	11.6787	0.02	78.75	17	-13.19621334	206.111
2002-09-02	1	245	1.1772	2.8005	13.3725	100.572	-42.5739	0	11.4757	0.02	76.4	17	-12.61585917	211.809
2002-09-02	2	245	1.06478	3.05265	13.3175	100.559	-38.5483	0	11.391	0.02	74.35	17	-8.973298585	197.408
2002-09-02	3	245	0.971657	3.51458	13.2475	100.536	-42.2604	0	11.5188	0.02	74.95	17	-13.04203309	194.814
2002-09-02	4	245	0.894841	3.26917	13.1875	100.526	-38.4406	0	11.3188	0.02	77.5	17	-12.1948455	195.457
2002-09-02	5	245	0.712955	2.67172	13.135	100.541	-37.4036	0	10.8257	0.68075	80.25	17	-12.23432701	190.629
2002-09-02	6	245	0.859536	3.29224	13.0675	100.563	-26.6915	0	11.6979	45.5975	81.15	17	-9.491085995	195.809
2002-09-02	7	245	1.13146	3.51633	12.9925	100.604	-4.03876	0	13.2086	168.75	83.4	17	-15.55322	207.192
2002-09-02	8	245	1.36739	3.69087	13.0475	100.622	-16.5349	0	14.1294	153.125	81.05	17	-21.29701232	215.719
2002-09-02	9	245	1.41974	4.91688	13.045	100.611	69.2123	0	15.5564	399.1	75.35	17	-14.4649848	213.515
2002-09-02	10	245	1.66089	4.345	13.21	100.611	84.9018	0	16.457	462.275	71.9	17	-51.79127261	217.773
2002-09-02	11	245	1.62613	3.97581	13.32	100.607	96.9468	0	17.1208	518.875	69.85	17	-53.39888397	219.633
2002-09-02	12	245	1.66129	3.84706	13.45	100.59	117.25	0	18.0017	617.325	66.25	17	-55.41637005	214.096
2002-09-02	13	245	1.88075	3.83017	13.5975	100.59	95.276	0	18.7452	627.675	63.65	17	-71.88279144	213.059
2002-09-02	14	245	1.70143	3.93088	13.7325	100.554	82.3749	0	18.7741	535.5	61.2	17	-48.23465098	212.421
2002-09-02	15	245	1.77457	3.7281	13.82	100.511	55.8274	0	18.8575	462.1	60.05	17	-66.28231147	215.823
2002-09-02	16	245	1.75632	3.33841	13.9	100.475	27.7617	0	18.5567	351.325	60.7	17	-34.8366932	207.083
2002-09-02	17	245	1.82082	2.38064	13.975	100.46	-8.76264	0	18.0568	217.775	60.45	17	-26.14544617	208.259
2002-09-02	18	245	2.18753	1.65011	14.0525	100.457	-33.7892	0	16.0093	64.9925	64.3	17	-34.49215709	222.031
2002-09-02	19	245	2.20755	0.922158	14.025	100.448	-8.92163	0	12.6414	7.185	68.2	17	-24.90071243	264.389
2002-09-02	20	245	2.09013	0.60408	13.9025	100.461	4.60311	0	10.4653	0.02	69.45	17	-28.44484696	239.282
2002-09-02	21	245	2.06548	0.799923	13.71	100.449	-14.6698	0	9.00471	0.02	71	17	-13.14043279	209.08
2002-09-02	22	245	1.17001	1.01164	13.4775	100.408	-2.98345	0	7.2009	0.02	77.15	17	NA	201.082
2002-09-02	23	245	1.27102	1.18339	13.2225	100.389	0.686283	0	6.81763	0.02	77.05	17	NA	209.368
2002-09-03	0	246	1.37203	1.35515	12.9725	100.364	-0.454629	0	6.43437	0.02	77.3	17	NA	210.121
2002-09-03	1	246	1.15029	1.05293	12.7675	100.338	0.551006	0	6.01556	0.02	79.2	17	-0.503224407	204.388
2002-09-03	2	246	1.61475	0.996536	12.6	100.321	-2.05372	0	6.36069	0.02	78.4	17	NA	205.721
2002-09-03	3	246	1.83148	1.05786	12.4775	100.285	-5.35412	0	7.79638	0.02	78.05	17	-37.99776118	204.374
2002-09-03	4	246	1.83573	1.07003	12.435	100.237	-3.23536	0	9.32486	0.02	80.35	17	-19.69654782	203.364
2002-09-03	5	246	2.88747	0.714906	12.46	100.192	-2.78817	0	10.7264	0.308	81.45	17	-8.302408755	207.659
2002-09-03	6	246	2.47059	0.577604	12.5125	100.163	-1.58804	0	11.2024	13.4625	85.6	17	NA	203.996
2002-09-03	7	246	2.29183	0.700374	12.57	100.156	0.176249	0	12.5252	47.43	86.75	17	NA	200.325
2002-09-03	8	246	2.54569	1.04134	12.6125	100.155	6.15086	0	14.8606	113.9	83.2	17	NA	185.652
2002-09-03	9	246	1.90717	1.38231	12.715	100.135	13.3074	0	15.9821	212.925	81.9	17	NA	214.818
2002-09-03	10	246	1.01335	1.46585	12.7925	100.108	27.6889	0	17.4821	400.325	74.9	17	-10.86433311	228.753
2002-09-03	11	246	0.711381	0.902701	12.935	100.061	96.9722	0	19.7866	632.125	66.45	17	1.354639615	158.14
2002-09-03	12	246	0.627996	0.453158	13.255	100.027	48.8184	0	19.3361	452.75	58.3	17	10.26230673	141.46
2002-09-03	13	246	0.671959	0.561944	13.4525	99.9861	29.5513	0	19.1307	351	55.4	17	NA	154.374
2002-09-03	14	246	1.25333	0.0838603	13.62	99.9249	18.0102	0	18.5641	232.35	57.65	17	NA	134.195
2002-09-03	15	246	1.43408	0.403629	13.72	99.8374	22.2743	0	18.9811	305.2	57.3	17	NA	144.66
2002-09-03	16	246	1.99231	0.0461651	13.8325	99.7716	16.3868	0	18.6571	215.225	59.4	17	NA	139.463
2002-09-03	17	246	2.42512	0.148426	13.93	99.7226	-15.4952	0	17.203	121.5	63.95	17	NA	142.415
2002-09-03	18	246	2.12897	0.351505	13.97	99.6959	-12.3355	0	16.0546	47.1225	71.35	17	NA	160.165
2002-09-03	19	246	2.22841	0.126851	13.9975	99.6803	-5.09703	0	14.9766	3.204	75.4	17	2.567151195	173.944
2002-09-03	20	246	2.40778	0.262623	13.9275	99.6872	-6.7683	0	14.4975	0.02	76.4	17	2.283763893	89.5668
2002-09-03	21	246	2.02952	0.0168067	13.87	99.6629	-1.74654	0	13.9	0.02	78.05	17	0.025917526	224.916
2002-09-03	22	246	3.43851	0.102592	13.815	99.6188	-4.92352	0	13.8475	0.02	77.85	17	-0.003226009	323.263
2002-09-03	23	246	3.62585	0.0960159	13.775	99.5724	-3.31852	0	13.0366	0.02	79.85	17	NA	249.319
2002-09-04	0	247	3.16914	0.167993	13.7325	99.5274	-3.28684	0	12.9262	0.02	80	17	-0.01442931	253.233
2002-09-04	1	247	2.84375	0.23997	13.6825	99.4938	-2.89253	0	12.5426	0.02	80.6	17	NA	231.974
2002-09-04	2	247	3.16338	0.487993	13.635	99.4282	-2.05342	0	12.1804	0.02	83.1	17	-1.846798056	283.828
2002-09-04	3	247	3.69383	0.221272	13.5775	99.3598	-3.28208	0	11.9002	0.02	83.25	17	-6.825187397	275.646
2002-09-04	4	247	5.26168	0.369214	13.5125	99.315	2.58293	0	11.5738	0.02	83.4	17	-44.91766785	237.649
2002-09-04	5	247	4.33837	0.227058	13.455	99.2683	-0.184836	0	11.1435	2.73975	83.4	17	-5.732571652	241.286
2002-09-04	6	247	9.06274	0.287683	13.37	99.2439	1.79811	0	11.1677	34.395	84.15	17	-78.38786665	215.374
2002-09-04	7	247	11.1873	0.163208	13.2975	99.2352	-0.868617	0	12.2093	90.675	83.65	17	-4.687115907	188.142
2002-09-04	8	247	5.82395	0.385814	13.275	99.2241	3.73885	0	13.5619	127.275	89.4	17	-24.64885174	172.772
2002-09-04	9	247	4.18876	0.192907	13.26	99.2286	17.398	0	14.8415	366.675	93.35	17	10.29177145	80.1458

## Sheet: P2003
Date	Hour	Julian_date	Xair	windspeed	T_soil	Pressure	H	Rain	T_air2m	Glob_rad	RH	Cow	Flux	winddir
2003-06-20	0	171	1.07085	5.41337	12.795	99.25	-49.4419	0	12.2104	0.02	71.3	0	-40.82714766	255.138
2003-06-20	1	171	1.01023	6.03958	12.6825	99.25	-41.7353	0	12.3049	0.02	70.05	50	-32.72317432	254.563
2003-06-20	2	171	0.867952	5.2804	12.5575	99.3	-62.2061	0	12.2882	0.02	70.55	50	-15.27550609	255.515
2003-06-20	3	171	1.02145	6.02127	12.47	99.3	-35.3364	0	12.6393	10.4275	70.75	50	-21.30768155	253.402
2003-06-20	4	171	1.03549	5.57248	12.395	99.3	-36.6237	0	13.1382	51.8925	69.15	50	-22.03615648	256.826
2003-06-20	5	171	0.953903	4.67532	12.315	99.3	-28.6222	0	12.8525	172.85	72.25	50	-14.74344421	260.811
2003-06-20	6	171	1.10044	4.85824	12.355	99.35	16.9338	0	14.4856	304.15	65.65	50	-10.29483862	259.002
2003-06-20	7	171	1.04928	4.98767	12.465	99.4	67.4311	0	15.0898	469.225	63.25	50	4.863273976	264.384
2003-06-20	8	171	0.968879	5.52001	12.6625	99.4	103.488	0	15.6335	574.925	62.45	50	3.463034784	267.115
2003-06-20	9	171	1.05996	5.69	12.8825	99.4	126.918	0	15.7226	692.45	59.75	50	8.955874527	266.66
2003-06-20	10	171	1.02131	5.31771	13.215	99.5	187.136	0	14.3682	439.975	64.4	50	15.70299496	266.181
2003-06-20	11	171	1.10807	5.25608	13.215	99.5	29.7004	0	15.5885	716.025	65.75	50	-89.95290642	260.513
2003-06-20	12	171	0.856287	4.78189	13.415	99.55	159.035	0	16.4826	641.7	56.8	50	-58.15779466	275.459
2003-06-20	13	171	1.05678	5.11419	13.62	99.6	125.885	0	16.1288	625.05	56.45	50	-50.09492532	262.683
2003-06-20	14	171	0.745751	5.76586	13.735	99.6	157.463	0	16.0632	637.95	53.9	50	-67.44515596	275.313
2003-06-20	15	171	0.717805	5.22225	13.72	99.6	38.7649	0	15.6549	403.475	56	50	21.44362095	272.703
2003-06-20	16	171	0.692614	4.42542	13.6425	99.65	54.6788	0	15.2384	239.35	57.05	50	29.84548281	267.532
2003-06-20	17	171	0.881678	3.9769	13.6175	99.6	123.813	0	15.2297	370.45	56.9	50	26.2005858	259.812
2003-06-20	18	171	1.06895	4.05126	13.565	99.7	28.0396	0	14.1543	224.15	61.15	50	2.687714907	255.825
2003-06-20	19	171	0.858166	3.48486	13.415	99.7	-4.63549	0	13.5322	113.625	64.6	50	-3.191934379	245.245
2003-06-20	20	171	0.827678	3.94918	13.295	99.7	-19.6609	0	12.9698	40.37	68.6	50	6.726469573	248.512
2003-06-20	21	171	0.819244	3.43354	13.115	99.7	-37.7686	0	12.646	18.9025	72.25	50	-8.568739669	247.368
2003-06-20	22	171	0.808576	3.16369	12.995	99.7	-23.9817	0	12.7979	0.02	70.9	50	-7.883076676	246.836
2003-06-20	23	171	0.726781	3.05374	12.89	99.7	-20.809	0	12.4047	0.02	71.1	50	14.08940856	243.869
2003-06-21	0	172	0.788793	2.45391	12.765	99.7	-47.8061	0	11.9754	0.02	72.35	50	-3.694222881	241.421
2003-06-21	1	172	0.641462	2.44683	12.665	99.7	-43.4755	0	11.7455	0.02	72.95	50	8.058505718	242.018
2003-06-21	2	172	0.672853	2.30498	12.5625	99.7	-47.5673	0	12.1671	0.02	73.35	50	4.539128434	244.581
2003-06-21	3	172	0.70446	2.40921	12.5025	99.7	-27.7951	0	11.7683	8.015	73.6	50	7.208596728	240.91
2003-06-21	4	172	0.857177	2.43424	12.44	99.7	-38.9953	0	11.8492	32.98	72.75	50	-0.480046225	244.103
2003-06-21	5	172	0.861761	1.75637	12.4075	99.7	-24.0035	0	12.6564	88.7	72.2	50	8.127837083	255.133
2003-06-21	6	172	0.980213	2.26533	12.4275	99.7	-11.1057	0	13.428	131.825	69.9	50	2.128874805	254.857
2003-06-21	7	172	0.975666	2.62187	12.475	99.7	-0.785381	0	13.7466	140.875	68.15	50	4.951245574	255.261
2003-06-21	8	172	1.32372	2.47149	12.525	99.7	2.45284	0	14.4186	196.025	65.6	50	-7.494698084	250.001
2003-06-21	9	172	1.17117	2.16416	12.6275	99.7	4.77076	0	14.7657	265.15	66.7	50	-9.711595378	248.729
2003-06-21	10	172	1.05671	2.37867	12.8025	99.7	50.4654	0	15.2004	377.575	68	50	-12.43041922	260.997
2003-06-21	11	172	0.813638	2.01428	13.02	99.7	70.9532	0	14.7847	302.325	68.75	50	3.027067974	256.322
2003-06-21	12	172	1.06064	2.0194	13.13	99.6	20.6832	0	15.1767	234.425	69.85	50	-15.59545577	264.032
2003-06-21	13	172	1.42325	2.50985	13.2425	99.6	46.5941	0.404	15.5674	364.65	68.55	50	-75.97213671	255.948
2003-06-21	14	172	1.28306	2.46226	13.3625	99.6	59.1803	0	15.5888	272.35	65.2	50	-34.11466686	256.913
2003-06-21	15	172	1.0841	1.8632	13.4225	99.55	28.4856	0.404	16.1713	275.3	65.95	50	-21.30778676	262.601
2003-06-21	16	172	1.26312	1.83684	13.4775	99.5	49.1054	0	17.5794	367.75	60.8	50	-26.41421409	250.289
2003-06-21	17	172	0.924607	2.92641	13.5975	99.45	64.0499	0	17.8229	243.35	55.25	50	-8.057154263	282.297
2003-06-21	18	172	1.87905	1.00079	13.6725	99.4	1.949	0	16.9954	109.875	57.8	50	5.338027771	49.0221
2003-06-21	19	172	2.47736	2.50078	13.6525	99.4	-7.76727	0	16.067	56.3975	63.85	50	0.378851443	53.6407
2003-06-21	20	172	3.75233	2.6458	13.59	99.3	0.129704	0	14.671	41.0775	70.7	50	-4.500060905	38.1373
2003-06-21	21	172	4.77832	2.67733	13.5	99.3	0.546397	0	13.8134	25.1625	71.75	50	-26.40803883	324.586
2003-06-21	22	172	2.81795	2.8	13.37	99.3	-2.49684	0	12.919	0.02	74.65	50	-2.973198324	253.208
2003-06-21	23	172	2.71145	2.50787	13.2225	99.2	-4.71662	0	12.8034	0.02	79.6	50	-0.997979512	211.696
2003-06-22	0	173	2.05293	2.68272	13.035	99.1	-6.76779	0	12.2709	0.02	82.15	50	-13.87232866	228.049
2003-06-22	1	173	2.54066	2.95689	12.9225	99	-3.25281	0	12.5283	0.02	81.6	50	-10.78049885	216.317
2003-06-22	2	173	4.63273	2.84254	12.8425	98.95	-6.51382	0	12.4526	0.02	78.75	50	NA	224.526
2003-06-22	3	173	3.86295	3.03681	12.785	98.9	-2.22226	0.202	12.1484	9.1025	79.05	50	-2.509158079	242.548
2003-06-22	4	173	7.4305	2.33563	12.7325	98.85	-4.38283	0	12.4615	28.8175	77.4	50	NA	89.1704
2003-06-22	5	173	7.68558	0.699111	12.7125	98.8	-0.805674	0	13.8419	41.9275	75.55	50	-10.74429324	185.051
2003-06-22	6	173	3.1162	1.11669	12.69	98.7	-1.72098	0.606	14.8294	62.0175	76	50	10.31480674	16.2377
2003-06-22	7	173	3.16834	2.93902	12.74	98.7	3.90419	0	15.0415	189	77.25	50	NA	33.4893
2003-06-22	8	173	2.81629	1.71401	13.0025	98.6	15.1939	0	14.5595	259.875	83.85	50	53.78779347	53.3242
2003-06-22	9	173	2.60886	2.25652	13.33	98.55	42.2561	0	14.9178	270.425	84.7	50	86.71106054	39.3088
2003-06-22	10	173	2.74303	1.88085	13.4975	98.45	31.3038	0	16.5613	278.55	81	50	45.90155664	39.1659
2003-06-22	11	173	3.20553	3.28577	13.7525	98.4	65.752	0	17.3014	409.75	75.6	50	63.53078524	48.6197
2003-06-22	12	173	2.37916	0.141326	14.085	98.3	62.1153	0	20.6328	398.825	66.1	50	95.8301116	111.994
2003-06-22	13	173	2.22774	1.45409	14.325	98.2	23.0936	0	19.701	413.9	71.75	50	15.22606317	61.8814
2003-06-22	14	173	2.71457	2.12085	14.7025	98.1	99.0239	0	21.1868	512.65	69.75	50	105.6230212	35.9954
2003-06-22	15	173	2.11795	2.30922	15	98.1	59.345	0	19.5293	350.875	71.3	50	66.48218306	38.1547
2003-06-22	16	173	1.7455	1.53503	14.9875	98.05	9.52666	0	18.0055	63.225	76.95	50	21.85276732	53.5166
2003-06-22	17	173	1.83363	1.95821	14.8875	98	7.44773	0	18.4231	236.075	74.1	50	6.148488026	46.6785
2003-06-22	18	173	1.35978	0.521919	14.8575	98	11.2899	0	17.4968	97.475	77	50	21.87637319	166.106
2003-06-22	19	173	2.09273	0.0629794	14.76	98	6.60804	0	17.2064	43.9325	78.45	50	-22.52350468	168.983
2003-06-22	20	173	2.42489	0.406209	14.665	98	-3.58911	0	16.1039	33.8075	82.1	50	-0.148565727	41.7339
2003-06-22	21	173	3.23999	2.67733	14.5575	98	1.37133	0	13.8134	21.8925	80.8	50	NA	129.723
2003-06-22	22	173	2.73907	2.56908	14.46	98	-29.5911	0	16.5429	0.02	78.15	50	35.14027267	252.28
2003-06-22	23	173	2.29057	2.81268	14.34	98.05	-17.7679	0	15.779	0.02	77.75	50	31.54213743	251.626
2003-06-23	0	174	1.74455	2.54476	14.2025	98	-20.0076	0	14.8174	0.02	80.85	50	9.962234917	243.704
2003-06-23	1	174	1.07237	2.59799	14.06	98	-18.2046	0	14.2679	0.02	82.45	52	8.154877299	234.302
2003-06-23	2	174	1.01278	2.80776	13.9375	98.05	-4.39095	0	13.7808	0.02	82.05	52	9.845076264	238.885
2003-06-23	3	174	1.57342	3.11781	13.7975	98	-33.9319	0	13.1378	9.3975	75.6	52	3.068584185	249.522
2003-06-23	4	174	1.72112	3.60046	13.605	98	-45.5445	0	13.3916	31.0275	73.15	52	78.4831291	258.05
2003-06-23	5	174	1.89146	3.11221	13.475	98.05	-30.2767	0	13.9414	74.63	71.1	52	84.33103402	251.012
2003-06-23	6	174	2.17676	2.83473	13.4225	98.1	1.16341	0	15.093	117.75	71.2	52	23.8569548	256.069
2003-06-23	7	174	1.86425	4.05166	13.4225	98.1	15.915	0	15.4317	174.8	69.95	52	56.04107265	255.749
2003-06-23	8	174	2.03022	4.07818	13.42	98.2	13.6543	0	14.9617	302.45	67.6	52	30.11980204	244.469
2003-06-23	9	174	2.44791	4.42165	13.4675	98.2	34.5504	0	14.9586	519.875	67.6	52	34.49448903	255.402
2003-06-23	10	174	2.61681	4.91257	13.605	98.2	106.893	0	17.2594	767.025	54.45	52	117.4662786	264.49
2003-06-23	11	174	2.59744	4.59572	13.8925	98.3	206.854	0	17.5467	737.05	50.4	52	78.17246841	261.794
2003-06-23	12	174	2.17411	4.47001	14.0375	98.4	76.7048	0	14.1219	346.675	65.5	52	124.4613005	261.312
2003-06-23	13	174	2.55653	5.14884	14	98.5	92.3493	0	15.2931	546.9	66.65	52	236.7314388	250.419
2003-06-23	14	174	2.89996	4.51153	14.1075	98.55	86.5929	0	15.0863	506.675	60.95	52	269.4969658	253.671
2003-06-23	15	174	2.81193	3.59038	14.0875	98.6	31.1383	0	15.3984	347.65	64.6	52	173.5256952	253.58
2003-06-23	16	174	2.61084	4.4658	14.1225	98.6	10.8352	0	15.2654	326.5	64.5	52	160.0778478	248.682
2003-06-23	17	174	2.60043	4.26017	14.095	98.7	16.3775	0	14.617	216	67.1	52	188.1615488	252.973
2003-06-23	18	174	2.40194	3.80173	14.0075	98.75	2.38745	0	14.1901	174.375	68.35	52	175.7794659	260.959
2003-06-23	19	174	1.90762	2.66269	13.88	98.85	-18.4847	0	13.3782	77.15	70.85	52	169.4252177	254.974
2003-06-23	20	174	2.07475	3.42639	13.7475	98.9	-29.9369	0	12.7307	40.055	74	52	132.8608218	261.128
2003-06-23	21	174	1.7225	3.32171	13.575	98.95	-47.0175	0	12.2369	11.1725	76.75	52	127.865095	257.885
2003-06-23	22	174	1.7744	3.67918	13.42	99	-50.8462	0	11.9948	0.02	79.25	52	99.85101032	258.637
2003-06-23	23	174	1.54632	2.9437	13.27	99.1	-60.0737	0	11.8631	0.02	78.85	52	134.7277225	264.537
2003-06-24	0	175	1.57288	2.89192	13.15	99.2	-51.7076	0	11.6169	0.02	78.45	52	80.58803202	262.876
2003-06-24	1	175	1.52554	3.02212	13.0425	99.25	-51.9277	0	11.094	0.02	79.4	52	103.9841389	257.802
2003-06-24	2	175	1.12105	1.27889	12.92	99.3	-55.5267	0	10.2768	0.02	80.3	52	2.227808685	234.019
2003-06-24	3	175	1.89293	3.03411	12.785	99.3	-60.2882	0	10.5464	4.385	79.55	52	49.58144288	260.098
2003-06-24	4	175	1.90937	2.97416	12.66	99.35	-62.7599	0	10.662	30.6575	79.1	52	102.2628644	260.068
2003-06-24	5	175	1.92907	3.62299	12.565	99.4	-49.1841	0	11.3378	110.325	77.25	52	121.1310567	262.119
2003-06-24	6	175	1.67838	3.89633	12.495	99.45	-1.49007	0	12.4262	256.675	74.95	52	147.5703447	273.548
2003-06-24	7	175	1.85997	3.69205	12.52	99.5	58.4556	0	13.6916	410.975	71.75	52	133.0152843	275.125
2003-06-24	8	175	2.11683	3.46053	12.69	99.6	122.89	0	14.8418	555.175	66.9	52	172.0769039	267.513
2003-06-24	9	175	2.42236	2.75649	12.9875	99.6	146.166	0	16.1192	673.35	64.65	52	129.9527913	264.569
2003-06-24	10	175	2.35438	2.45348	13.425	99.7	111.582	0	16.5307	720.475	61.45	52	144.0735409	256.321
2003-06-24	11	175	2.35679	2.53617	13.7525	99.7	105.619	0	17.2548	683.275	61.1	52	129.5288483	263.981
2003-06-24	12	175	2.3096	2.32387	14.0625	99.7	213.314	0	17.9677	829.825	58.95	52	321.4267644	277.262
2003-06-24	13	175	2.0231	2.5644	14.3325	99.8	77.0048	0	17.4796	544.975	59.15	52	110.3725169	273.154
2003-06-24	14	175	2.16093	2.78583	14.455	99.8	66.7208	0	17.3774	503.35	61.05	52	102.3772179	254.938
2003-06-24	15	175	2.09162	2.43637	14.575	99.8	86.134	0	17.8553	563.575	59.2	52	178.6067642	260.671
2003-06-24	16	175	1.85763	2.37716	14.7125	99.8	54.2665	0	17.8433	539.8	57.35	52	70.57183328	249.012
2003-06-24	17	175	1.83028	2.26062	14.77	99.8	19.2559	0	16.969	299.525	61.45	52	26.31723652	245.902
2003-06-24	18	175	1.88161	2.34178	14.6675	99.85	9.21611	0	16.5601	240.55	63.25	52	34.63083821	240.422
2003-06-24	19	175	1.79462	2.06712	14.5375	99.9	-12.2157	0	15.414	139.3	65.65	52	11.45608523	242.484
2003-06-24	20	175	1.43265	1.49933	14.3525	99.9	-13.2343	0	13.6245	51.32	72	52	0.785291771	232.911
2003-06-24	21	175	1.63289	1.50122	14.1375	99.9	-20.5398	0	12.6908	12.3275	76.2	52	-0.519004791	227.359
2003-06-24	22	175	3.39617	1.63258	13.935	100	-15.2995	0	12.5047	0.02	76.4	52	-3.75335181	238.535
2003-06-24	23	175	2.62054	1.89681	13.7525	100	-22.5624	0	12.2227	0.02	76.35	52	2.961904422	258.953
2003-06-25	0	176	1.74085	0.56608	13.5875	100	-30.5204	0	10.5778	0.02	76.75	52	11.40040886	237.698
2003-06-25	1	176	1.84579	2.95689	13.365	100	-27.6454	0	12.5283	0.02	81	52	NA	227.137
2003-06-25	2	176	1.64907	2.84254	13.095	100	-3.0779	0	12.4526	0.02	82.55	52	3.87067923	234.809
2003-06-25	3	176	1.6749	3.03681	12.8375	100	2.15181	0	12.1484	4.44	83.65	52	33.349182	229.098
2003-06-25	4	176	1.78485	0.947004	12.5975	100	-1.39321	0	7.8637	30.175	88.85	52	3.674210455	230.121
2003-06-25	5	176	2.59597	1.05993	12.43	100	-2.18674	0	10.441	126.3	88.2	52	1.238693608	213.729
