# Supplementary material for: Process-based modelling of NH 3 exchange with grazed grasslands
Source: Copernicus journal article supplement (doi:10.5194/bg-14-4161-2017), 2017-09-21
Supplement: Supplementary file 1 [file bg-14-4161-2017-supplement.zip › Supplementary_material.pdf]

# Supplementary material

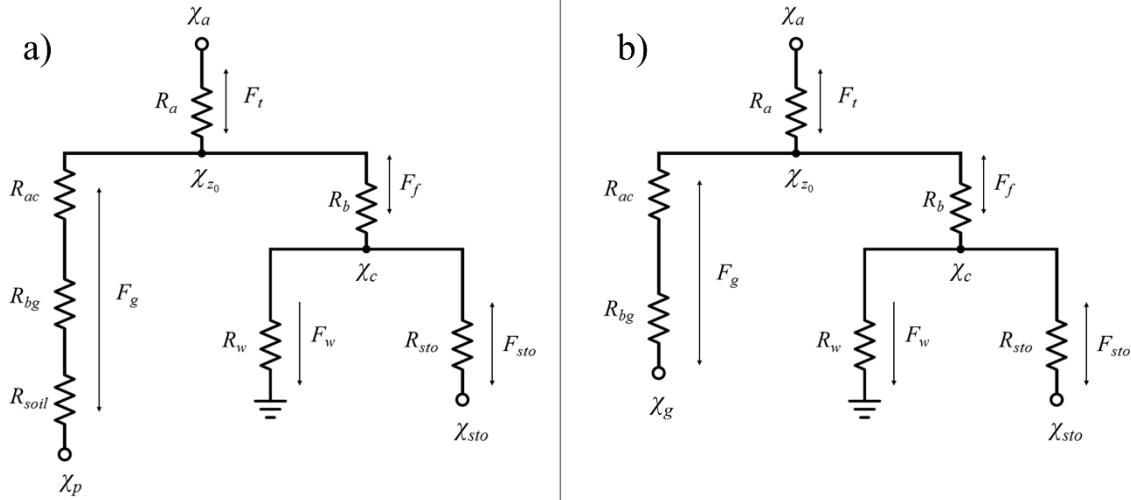

5 **Figure S1. Resistance models applied for the simulation of the  $\text{NH}_3$  exchange flux a) over the urine patches (as used in GAG\_patch in M3ring et al., 2016) and b) over the non-urine area (as suggested by Nemitz et al. 2001). The indicated resistances are: the**  
**aerodynamic resistance ( $R_a$ ), the quasi-laminar resistance ( $R_b$ ) over the canopy, aerodynamic resistance within the canopy ( $R_{ac}$ ),**  
**quasi-laminar resistance at the ground ( $R_{bg}$ ), soil resistance ( $R_{soil}$ ), resistance to water and wax on the leaf surface ( $R_w$ ) and stomatal**  
**resistance ( $R_{sto}$ ). The gaseous  $\text{NH}_3$  concentrations illustrated are: the ambient air concentration ( $\chi_a$ ), the canopy compensation point**  
10 **( $\chi_{z0}$ ), the compensation point above the vegetation ( $\chi_c$ ), the compensation point in the model soil pore under a urine patch ( $\chi_p$ ), the**  
**stomatal compensation point ( $\chi_{sto}$ ) and the compensation point on the ground in the non-urine area ( $\chi_g$ ). The fluxes shown are: the**  
**total net exchange above the given canopy ( $F_t$ ), the emission flux from soil ( $F_g$ ), the exchange flux above the vegetation ( $F_f$ ), the**  
**deposition flux to the leaf surface ( $F_w$ ) and the stomatal flux ( $F_{sto}$ ). For the definition of the resistances, fluxes and concentrations on**  
**Fig. a) and b, see M3ring et al. (2016) and Section 3.1 in the present study, respectively.**

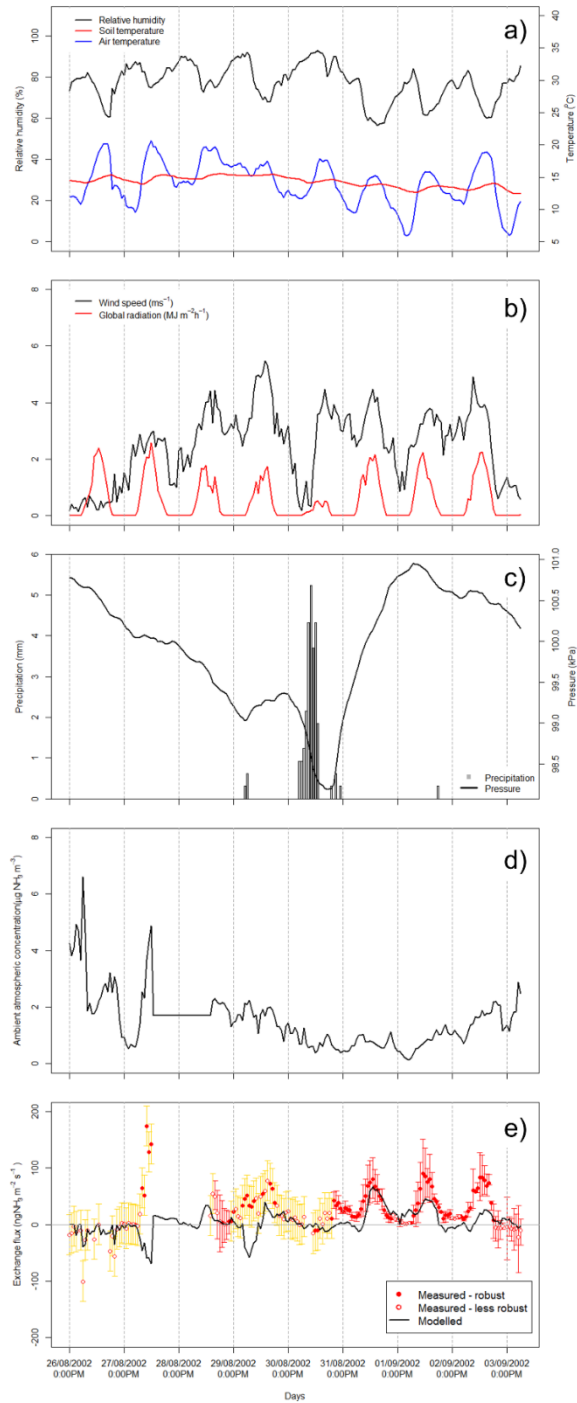

**Figure S2. Measured meteorological variables (relative humidity, soil and air temperature (a), wind speed and global radiation (b), precipitation and surface pressure (c), the measured ambient atmospheric concentration of  $\text{NH}_3$  (d) and the measured and simulated hourly  $\text{NH}_3$  fluxes (e) in P2002 in Easter Bush as plotted in Fig. 9a.**

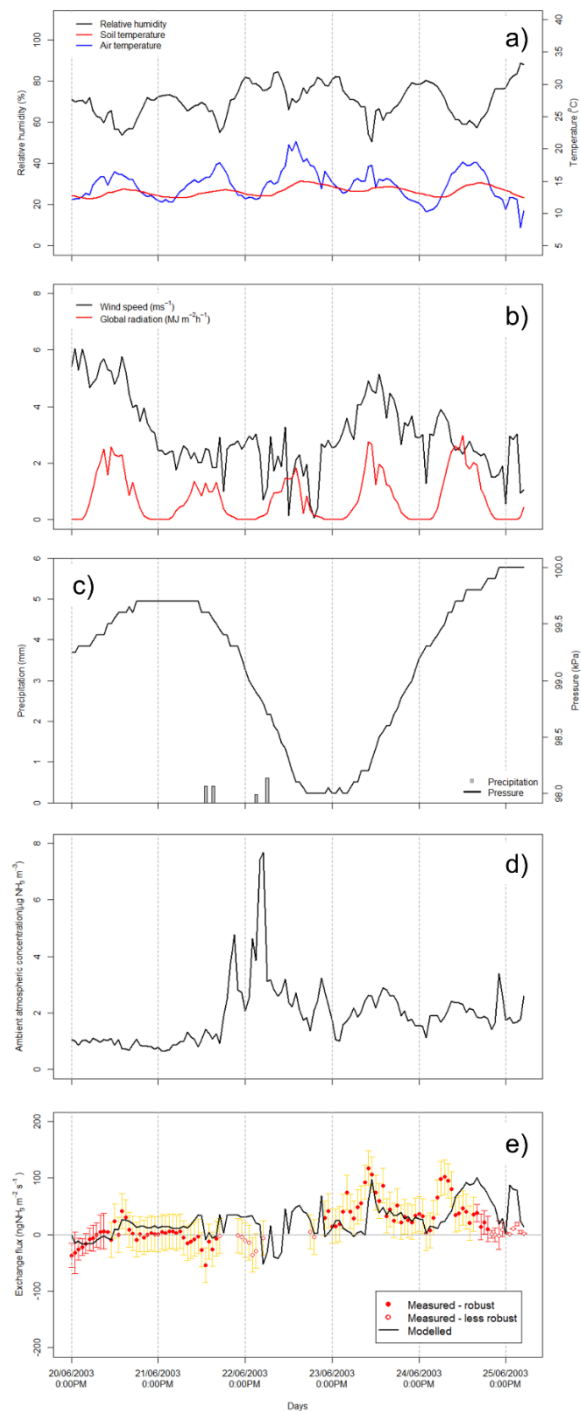

**Figure S3. Measured meteorological variables (relative humidity, soil and air temperature (a), wind speed and global radiation (b), precipitation and surface pressure (c), the measured ambient atmospheric concentration of  $\text{NH}_3$  (d) and the measured and simulated hourly  $\text{NH}_3$  fluxes (e) in P2003 in Easter Bush as plotted in Fig. 9b.**

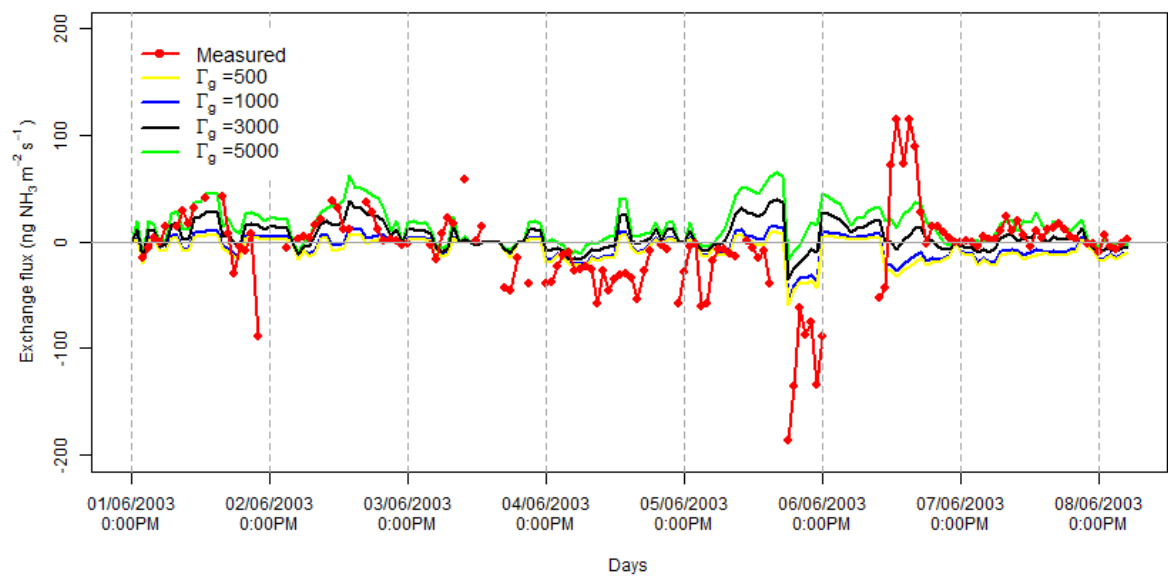

**Figure S4:** Model results for the calibration period with GAG\_field, using different values for the soil emission potential ( $\Gamma_g$ ).
